# Supplementary material
Source: MDPI journal article supplement (https://www.mdpi.com/2073-4441/14/21/3520)
Supplement: s1 [file s1]

## Supplementary Information

# Integrating hydrological connectivity in a process-response framework for restoration and monitoring prioritization of floodplain wetlands in the Ramganga basin, India

Manudeo Singh<sup>1,2</sup> and Rajiv Sinha<sup>1</sup>

<sup>1</sup>Department of Earth Sciences, Indian Institute of Technology Kanpur, India

<sup>2</sup>Institute of Geosciences, University of Potsdam, Germany

## Results:

District-wise wetland status and connectivity scenario are presented below.

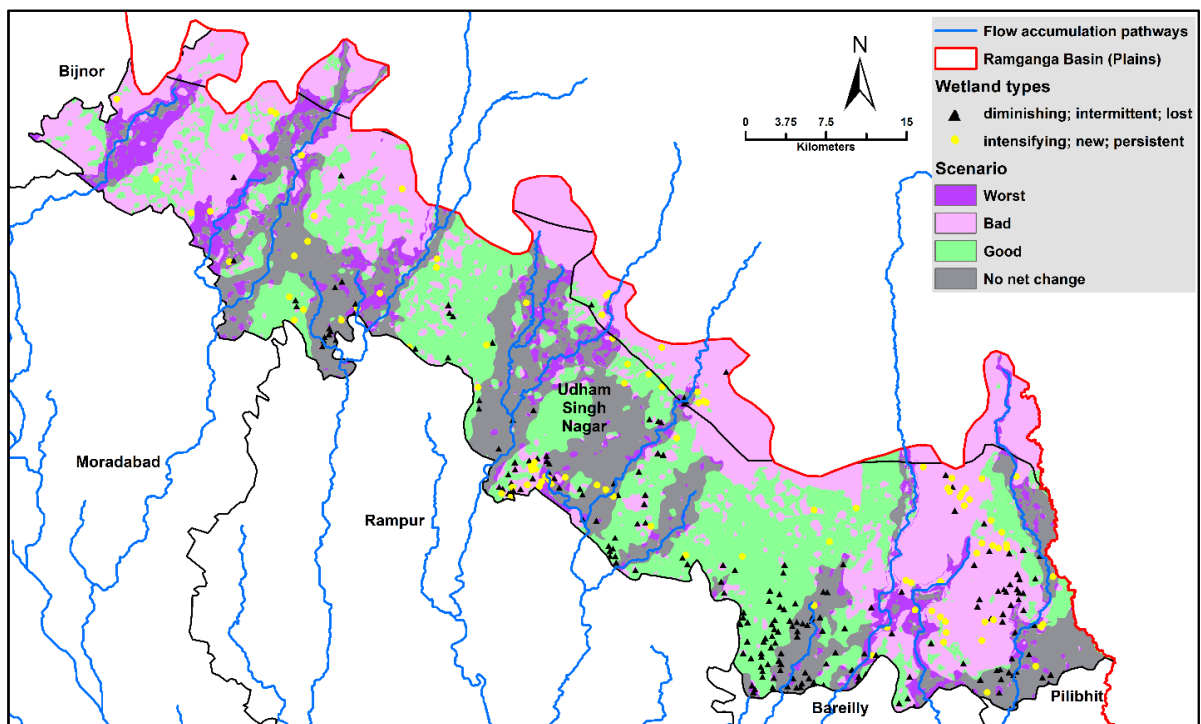

Figure S1: Wetland status and connectivity scenarios in Udham Singh Nagar district of the Ramganga Basin.

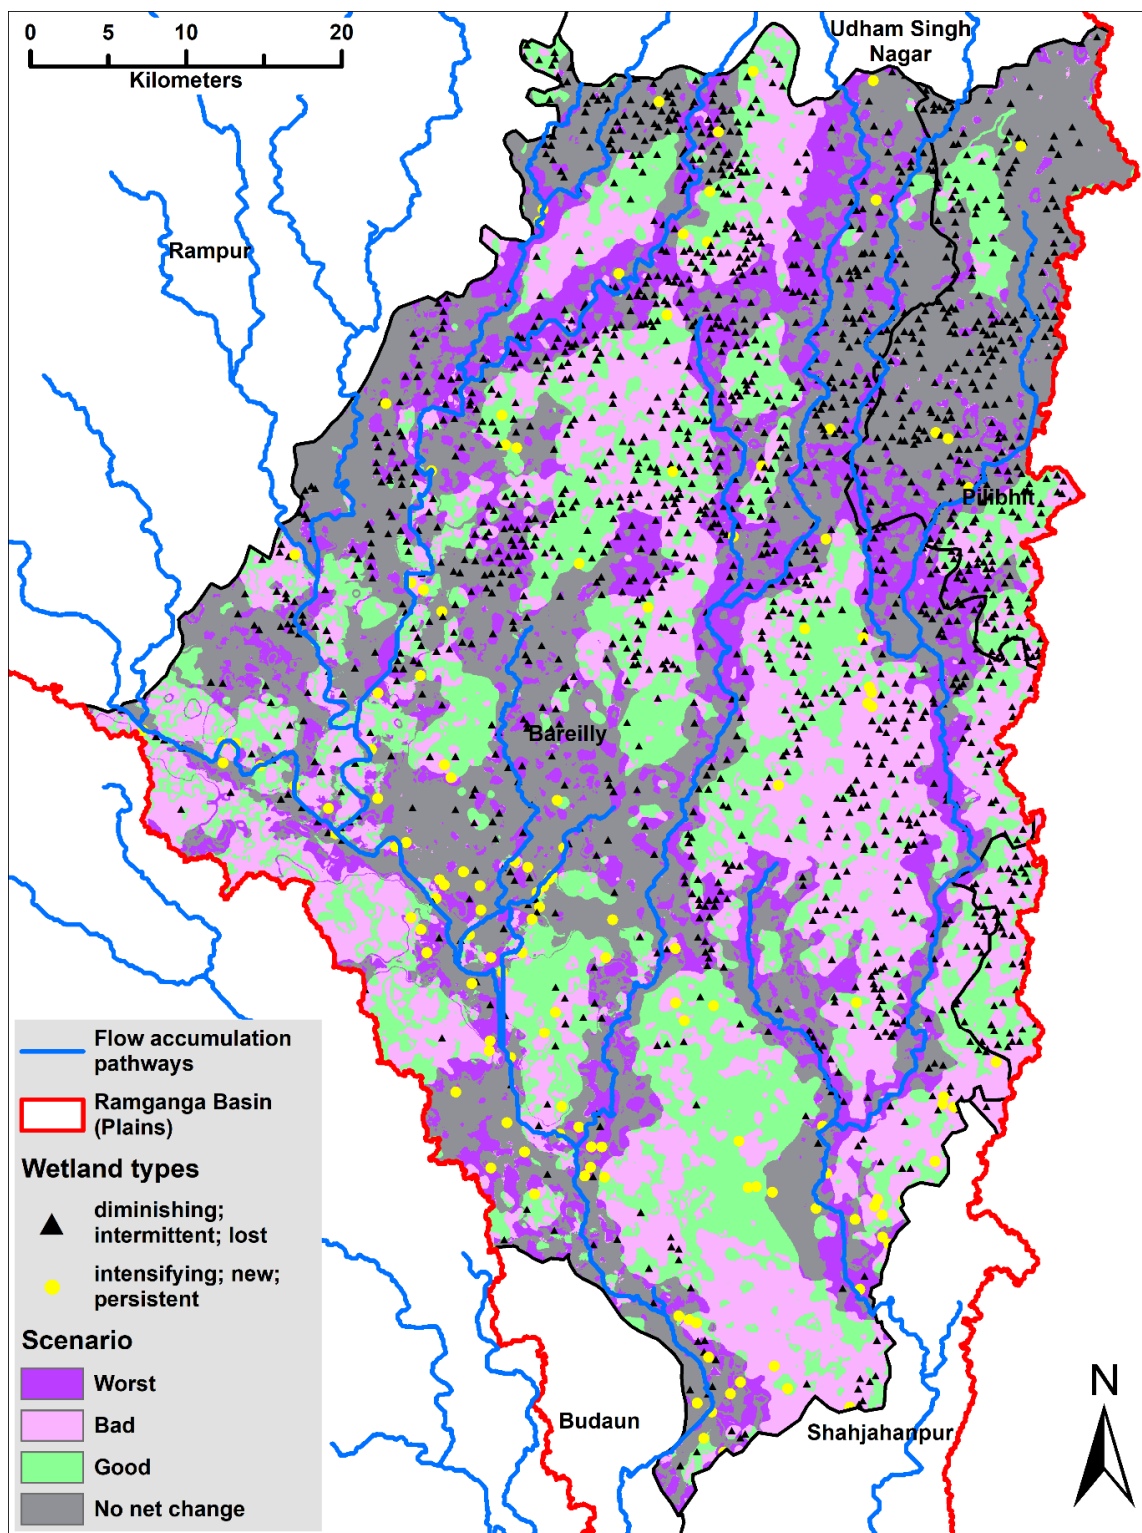

Figure S2: Wetland status and connectivity scenarios in Bareilly district of the Ramganga Basin.

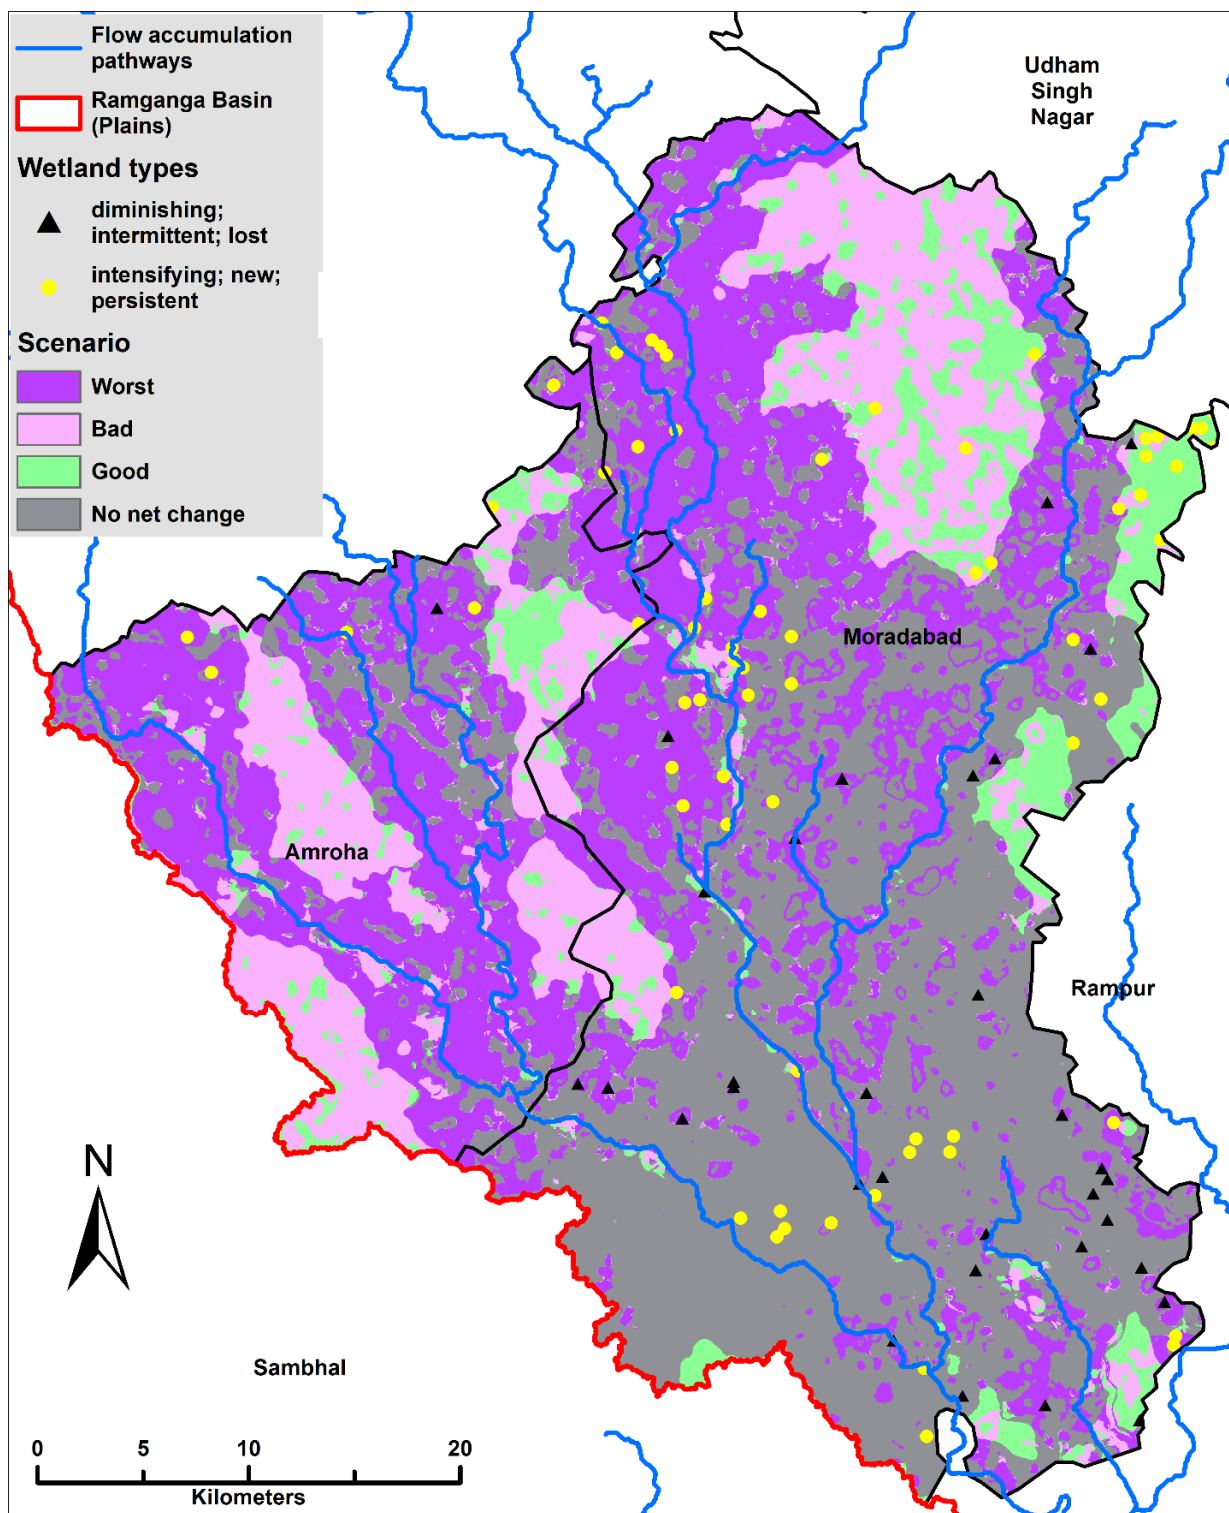

Figure S3: Wetland status and connectivity scenarios in Moradabad and Amroha districts of the Ramganga Basin.

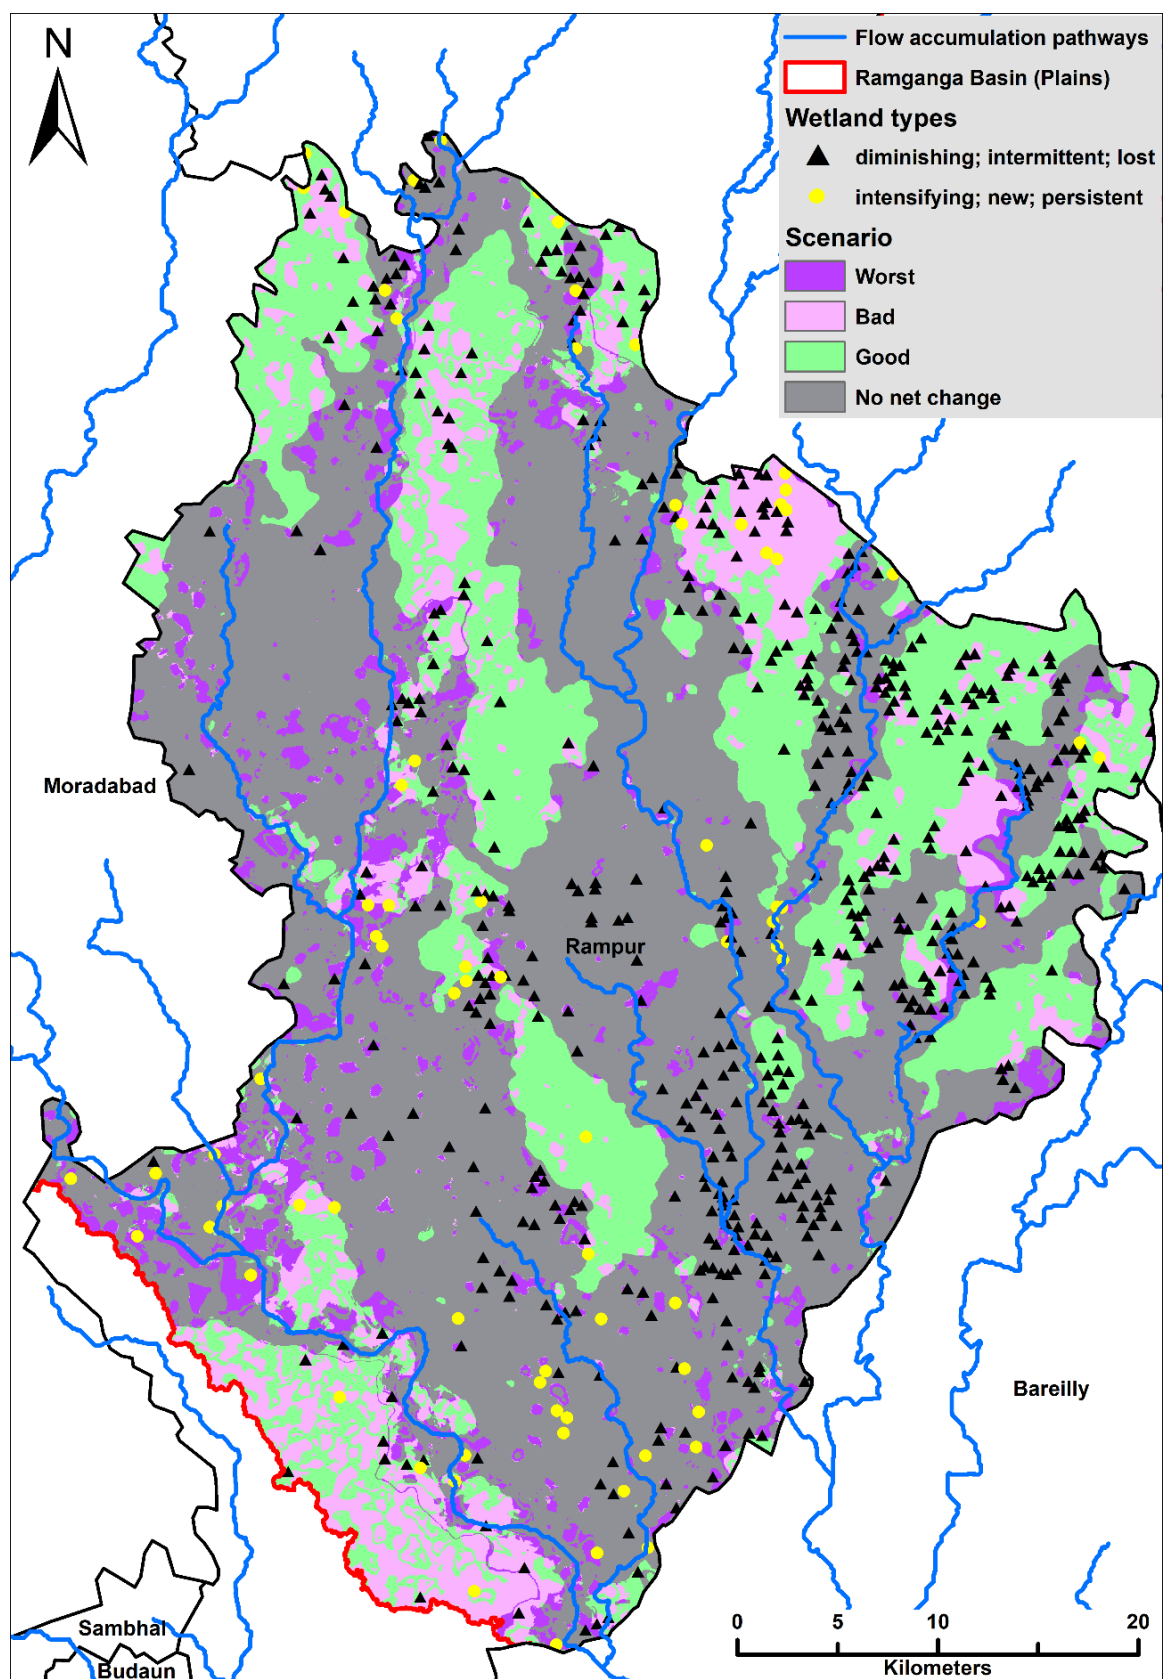

Figure S4: Wetland status and connectivity scenarios in Rampur district of the Ramganga Basin



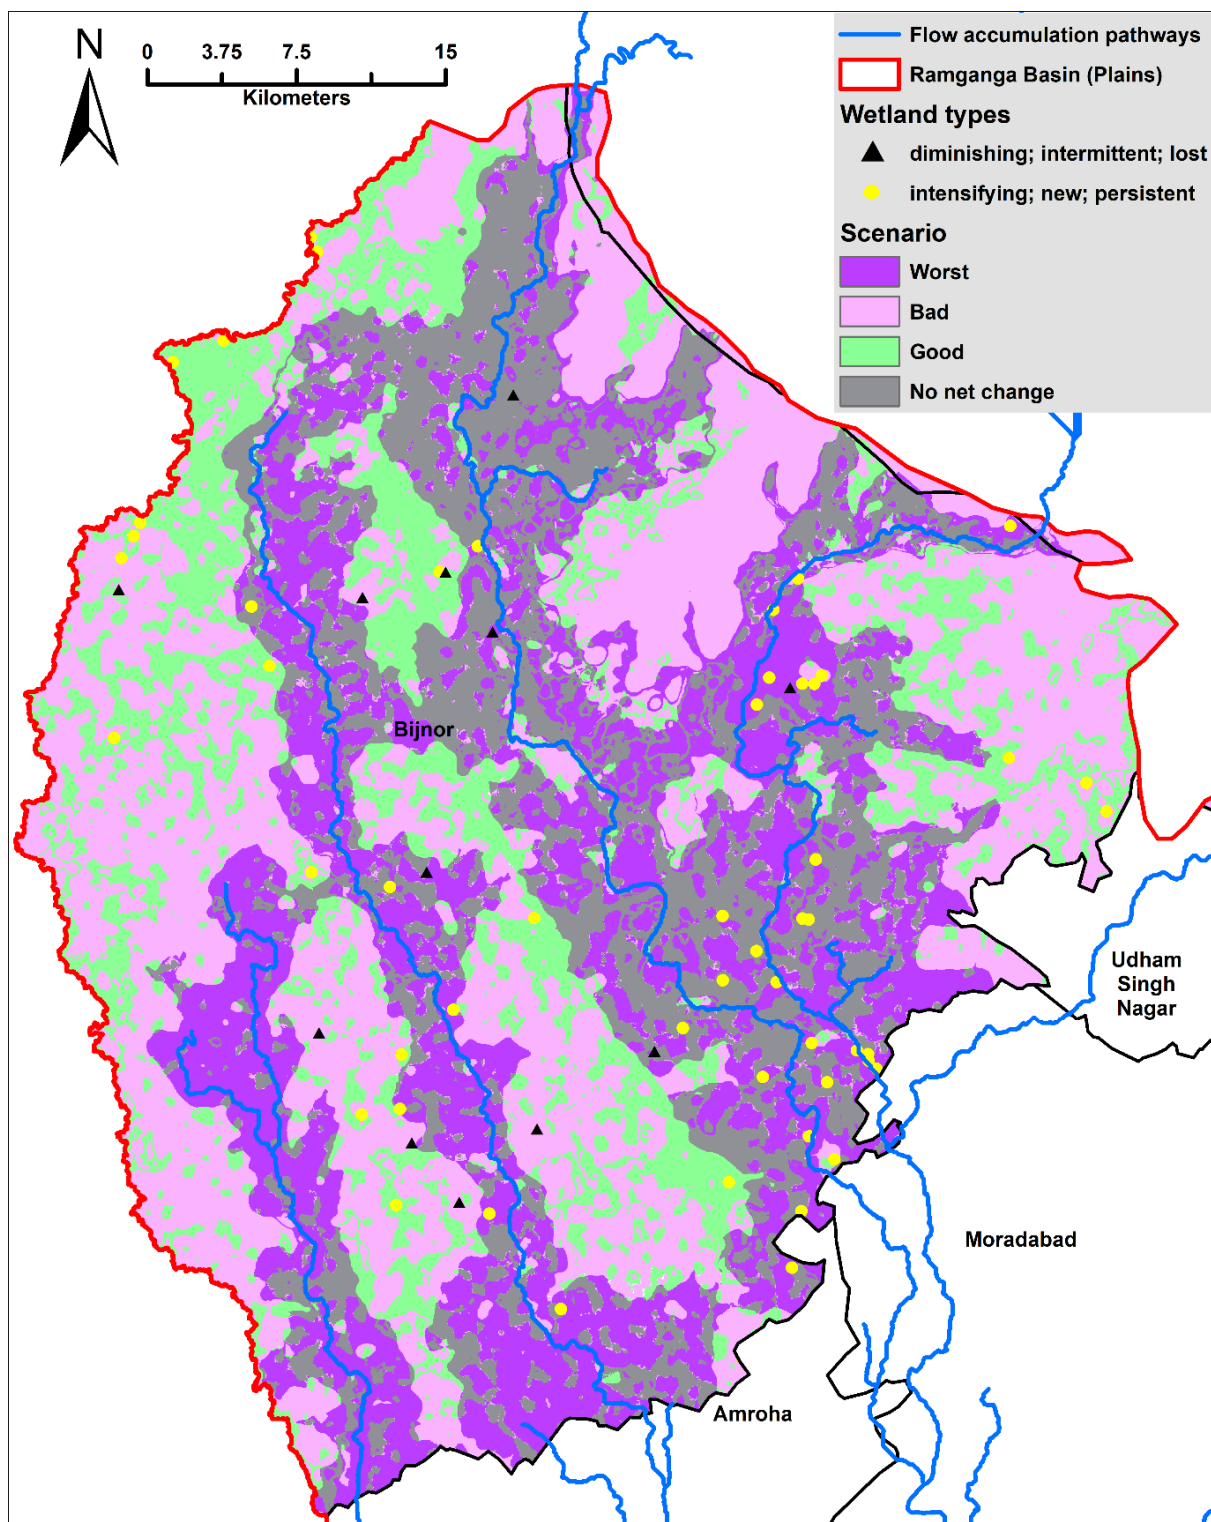

Figure S5: Wetland status and connectivity scenarios in Bijnor district of the Ramganga Basin.

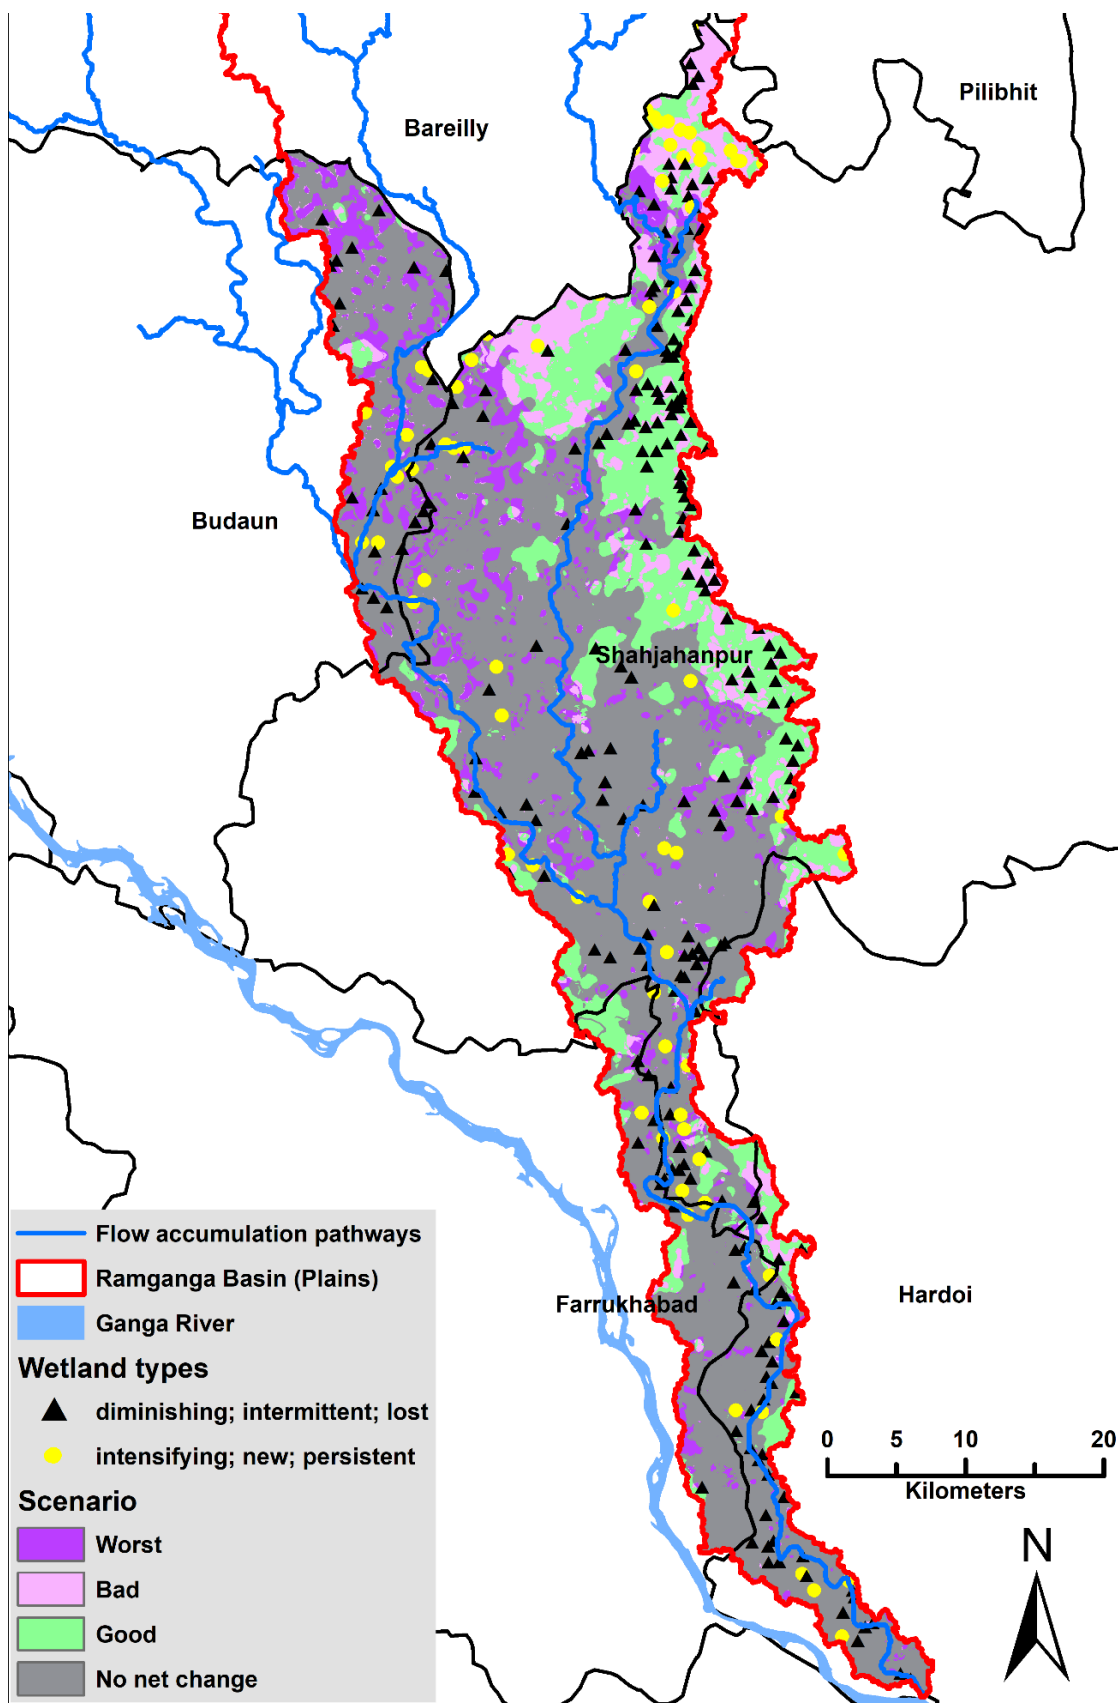

Figure S6: Wetland status and connectivity scenarios in Shahjahanpur district of the Ramganga Basin.

Table S1: District-wise distribution of wetland types based on the centroid location of the wetlands in the connectivity scenarios.

[illegible]

|             |        |        |              |       |            |          |            |            |          |          |            |            |
|-------------|--------|--------|--------------|-------|------------|----------|------------|------------|----------|----------|------------|------------|
|             |        |        |              | Good  | 2 (18.1)   | 0 (0.0)  | 1 (5.5)    | 3 (23.6)   | 0 (0.0)  | 0 (0.0)  | 0 (0.0)    | 0 (0.0)    |
|             |        |        |              | NNC   | 2 (6.2)    | 0 (0.0)  | 12 (73.7)  | 14 (79.9)  | 0 (0.0)  | 4 (39.3) | 4 (17.5)   | 8 (56.8)   |
| Farrukhabad | 2184.0 | 157.5  | 14 (88.5)    | Worst | 1 (2.4)    | 0 (0.0)  | 0 (0.0)    | 1 (2.4)    | 0 (0.0)  | 1 (21.5) | 0 (0.0)    | 1 (21.5)   |
|             |        |        |              | Bad   | 0 (0.0)    | 0 (0.0)  | 0 (0.0)    | 0 (0.0)    | 0 (0.0)  | 0 (0.0)  | 0 (0.0)    | 0 (0.0)    |
|             |        |        |              | Good  | 1 (7.5)    | 0 (0.0)  | 0 (0.0)    | 1 (7.5)    | 0 (0.0)  | 0 (0.0)  | 0 (0.0)    | 0 (0.0)    |
|             |        |        |              | NNC   | 2 (9.8)    | 0 (0.0)  | 5 (31.5)   | 7 (41.3)   | 0 (0.0)  | 1 (4.2)  | 3 (11.6)   | 4 (15.8)   |
| Hardoi      | 6006.5 | 188.6  | 46 (304.2)   | Worst | 4 (18.8)   | 0 (0.0)  | 0 (0.0)    | 4 (18.8)   | 0 (0.0)  | 0 (0.0)  | 1 (3.7)    | 1 (3.7)    |
|             |        |        |              | Bad   | 1 (8.5)    | 0 (0.0)  | 2 (5.4)    | 3 (13.9)   | 0 (0.0)  | 0 (0.0)  | 0 (0.0)    | 0 (0.0)    |
|             |        |        |              | Good  | 3 (19.0)   | 0 (0.0)  | 2 (5.8)    | 5 (24.8)   | 0 (0.0)  | 0 (0.0)  | 1 (6.2)    | 1 (6.2)    |
|             |        |        |              | NNC   | 18 (102.6) | 1 (2.5)  | 8 (42.4)   | 27 (147.5) | 0 (0.0)  | 2 (49.6) | 3 (39.8)   | 5 (89.4)   |
| Moradabad   | 2106.8 | 1487.0 | 90 (560.6)   | Worst | 1 (3.2)    | 3 (36.6) | 9 (72.5)   | 13 (112.4) | 0 (0.0)  | 1 (4.4)  | 16 (87.4)  | 17 (91.8)  |
|             |        |        |              | Bad   | 0 (0.0)    | 0 (0.0)  | 0 (0.0)    | 0 (0.0)    | 1 (2.3)  | 0 (0.0)  | 7 (35.9)   | 8 (38.1)   |
|             |        |        |              | Good  | 0 (0.0)    | 0 (0.0)  | 3 (30.1)   | 3 (30.1)   | 0 (0.0)  | 1 (7.2)  | 11 (46.2)  | 12 (53.5)  |
|             |        |        |              | NNC   | 1 (3.8)    | 3 (10.1) | 12 (83.1)  | 16 (97.0)  | 1 (22.8) | 2 (10.8) | 18 (104.1) | 21 (137.7) |
| Pilibhit    | 3589.7 | 415.3  | 358 (3949.0) | Worst | 4 (13.3)   | 0 (0.0)  | 32 (593.9) | 36 (607.2) | 0 (0.0)  | 0 (0.0)  | 1 (6.2)    | 1 (6.2)    |
|             |        |        |              | Bad   | 1 (13.7)   | 2 (7.2)  | 67 (473.4) | 70 (494.3) | 0 (0.0)  | 0 (0.0)  | 0 (0.0)    | 0 (0.0)    |
|             |        |        |              | Good  | 6 (24.2)   | 0 (0.0)  | 53 (780.5) | 59 (804.8) | 0 (0.0)  | 0 (0.0)  | 0 (0.0)    | 0 (0.0)    |



|                      |        |        |                 |       |               |          |                 |                 |         |               |               |                |
|----------------------|--------|--------|-----------------|-------|---------------|----------|-----------------|-----------------|---------|---------------|---------------|----------------|
|                      |        |        |                 | NNC   | 42<br>(404.4) | 0 (0.0)  | 147<br>(1620.8) | 189<br>(2025.1) | 0 (0.0) | 0 (0.0)       | 3 (11.6)      | 3 (11.6)       |
| Rampur               | 2571.0 | 2366.9 | 635<br>(3911.2) | Worst | 8 (170.7)     | 0 (0.0)  | 37<br>(151.1)   | 45<br>(321.8)   | 0 (0.0) | 2 (21.4)      | 8 (53.5)      | 10 (75.0)      |
|                      |        |        |                 | Bad   | 5 (17.5)      | 1 (3.6)  | 79<br>(413.4)   | 85<br>(434.5)   | 0 (0.0) | 1 (3.8)       | 16 (96.5)     | 17 (100.3)     |
|                      |        |        |                 | Good  | 14<br>(133.5) | 2 (8.7)  | 139<br>(850.4)  | 155<br>(992.6)  | 0 (0.0) | 3 (10.2)      | 11 (38.5)     | 14 (48.7)      |
|                      |        |        |                 | NNC   | 94<br>(763.1) | 5 (13.8) | 176<br>(894.8)  | 275<br>(1671.7) | 0 (0.0) | 12 (76.5)     | 22<br>(190.1) | 34 (266.6)     |
| Shahjahanpur         | 4649.8 | 1212.7 | 211<br>(4424.5) | Worst | 2 (30.8)      | 1 (3.1)  | 15<br>(201.0)   | 18<br>(234.8)   | 0 (0.0) | 1 (3.0)       | 5 (209.5)     | 6 (212.4)      |
|                      |        |        |                 | Bad   | 3 (42.5)      | 0 (0.0)  | 41<br>(2996.7)  | 44<br>(3039.2)  | 0 (0.0) | 0 (0.0)       | 14<br>(119.7) | 14 (119.7)     |
|                      |        |        |                 | Good  | 11 (83.9)     | 0 (0.0)  | 28<br>(187.4)   | 39<br>(271.3)   | 0 (0.0) | 3 (10.2)      | 3 (42.0)      | 6 (52.2)       |
|                      |        |        |                 | NNC   | 17<br>(101.4) | 1 (2.4)  | 43<br>(250.7)   | 61<br>(354.5)   | 2 (9.7) | 9 (50.0)      | 12 (80.7)     | 23 (140.4)     |
| Udham Singh<br>Nagar | 2861.6 | 1783.7 | 297<br>(8630.1) | Worst | 1 (2.5)       | 3 (8.4)  | 12 (75.4)       | 16 (86.3)       | 0 (0.0) | 1 (18.0)      | 10 (39.3)     | 11 (57.4)      |
|                      |        |        |                 | Bad   | 3 (10.0)      | 8 (33.1) | 44<br>(321.2)   | 55<br>(364.2)   | 0 (0.0) | 3<br>(5316.0) | 47<br>(407.1) | 50<br>(5723.0) |
|                      |        |        |                 | Good  | 6 (18.7)      | 3 (9.6)  | 64<br>(268.6)   | 73<br>(297.0)   | 0 (0.0) | 3<br>(1664.3) | 15 (66.1)     | 18<br>(1730.4) |
|                      |        |        |                 | NNC   | 8 (33.6)      | 3 (8.1)  | 49<br>(253.3)   | 60<br>(295.1)   | 0 (0.0) | 1 (4.1)       | 13 (72.6)     | 14 (76.7)      |

\*I: Intensifying, P: Persistent, N: New, D: Diminishing, L: Lost, In: Intermittent; RGB: Ramganga Basin; NCC: No net change

Table S2: Restoration priority distribution (in order of priority) for wetlands in Budaun, Bareilly, Shahjahanpur, Moradabad, and Rampur districts in Ramganga basin. Area in ha.

| Priority List | Budaun |       | Bareilly |        | Shahjahanpur |        | Moradabad |       | Rampur |        | Total |         |
|---------------|--------|-------|----------|--------|--------------|--------|-----------|-------|--------|--------|-------|---------|
|               | Count  | Area  | Count    | Area   | Count        | Area   | Count     | Area  | Count  | Area   | Count | Area    |
| <b>DJX</b>    | 3      | 23.6  | 67       | 553.4  | 1            | 6.8    | 3         | 30.1  | 41     | 241.4  | 115   | 855.3   |
| <b>DJY</b>    | 0      | 0     | 118      | 774    | 15           | 102    | 0         | 0     | 94     | 554.1  | 227   | 1430.1  |
| <b>DJZ</b>    | 0      | 0     | 52       | 286.8  | 23           | 162.5  | 0         | 0     | 20     | 197.1  | 95    | 646.4   |
| <b>DKX</b>    | 4      | 25    | 207      | 1839.9 | 21           | 118.8  | 6         | 48    | 111    | 871.7  | 349   | 2903.4  |
| <b>DKY</b>    | 10     | 54.9  | 116      | 761.7  | 32           | 200.7  | 9         | 46.7  | 126    | 612.7  | 293   | 1676.7  |
| <b>DKZ</b>    | 0      | 0     | 16       | 127.1  | 8            | 35     | 1         | 2.3   | 38     | 187.3  | 63    | 351.7   |
| <b>DLX</b>    | 0      | 0     | 90       | 1455.6 | 2            | 37.6   | 0         | 0     | 9      | 70.2   | 101   | 1563.4  |
| <b>DLY</b>    | 0      | 0     | 228      | 1814.7 | 20           | 241    | 0         | 0     | 61     | 293.6  | 309   | 2349.3  |
| <b>DLZ</b>    | 0      | 0     | 103      | 681.4  | 22           | 2760.6 | 0         | 0     | 15     | 70.8   | 140   | 3512.8  |
| <b>DMX</b>    | 1      | 46.6  | 158      | 1311.4 | 8            | 62.5   | 3         | 22.1  | 18     | 203.9  | 188   | 1646.5  |
| <b>DMY</b>    | 3      | 12    | 142      | 1030.1 | 9            | 161.8  | 10        | 90.4  | 23     | 96.9   | 187   | 1391.2  |
| <b>DMZ</b>    | 0      | 0     | 35       | 331.9  | 1            | 10.5   | 0         | 0     | 4      | 21     | 40    | 363.4   |
| <b>TOTAL</b>  | 21     | 162.1 | 1332     | 10968  | 162          | 3899.8 | 32        | 239.6 | 560    | 3420.7 | 2107  | 18690.2 |

Table S3: Monitoring priority distribution (in order of priority) for wetlands in Budaun, Bareilly, Shahjahanpur, Moradabad, and Rampur districts in Ramganga basin. Area in ha.

| Priority List | Budaun |      | Bareilly |       | Shahjahanpur |       | Moradabad |       | Rampur |       | Total |        |
|---------------|--------|------|----------|-------|--------------|-------|-----------|-------|--------|-------|-------|--------|
|               | Count  | Area | Count    | Area  | Count        | Area  | Count     | Area  | Count  | Area  | Count | Area   |
| SMZ           | 0      | 0    | 1        | 3.4   | 0            | 0     | 0         | 0     | 2      | 23.4  | 3     | 26.8   |
| SMY           | 0      | 0    | 7        | 57.1  | 5            | 209.3 | 6         | 23.8  | 3      | 15.5  | 21    | 305.7  |
| SMX           | 0      | 0    | 15       | 138.8 | 1            | 3.1   | 11        | 68    | 5      | 36.1  | 32    | 246    |
| SLZ           | 0      | 0    | 5        | 45.4  | 12           | 113.6 | 2         | 5.3   | 2      | 5.6   | 21    | 169.9  |
| SLY           | 0      | 0    | 22       | 141.5 | 2            | 6.1   | 4         | 27.5  | 13     | 87.7  | 41    | 262.8  |
| SLX           | 0      | 0    | 10       | 53.9  | 0            | 0     | 2         | 5.4   | 2      | 7     | 14    | 66.3   |
| SKZ           | 0      | 0    | 1        | 2.9   | 1            | 2.5   | 2         | 5.8   | 3      | 13    | 7     | 24.2   |
| SKY           | 2      | 28.6 | 15       | 107.4 | 11           | 67.1  | 7         | 30.2  | 18     | 129.8 | 53    | 363.1  |
| SKX           | 6      | 28.3 | 20       | 151.9 | 11           | 70.8  | 12        | 101.8 | 13     | 123.9 | 62    | 476.7  |
| SJZ           | 0      | 0    | 6        | 22.7  | 6            | 52.2  | 1         | 4.7   | 2      | 5.5   | 15    | 85.1   |
| SJY           | 0      | 0    | 17       | 79.7  | 0            | 0     | 6         | 26.9  | 7      | 25.3  | 30    | 131.9  |
| SJX           | 0      | 0    | 12       | 156.2 | 0            | 0     | 5         | 21.9  | 5      | 17.9  | 22    | 196    |
| TOTAL         | 8      | 56.9 | 131      | 960.9 | 49           | 524.7 | 58        | 321.3 | 75     | 490.7 | 321   | 2354.5 |

Table S4: Restoration priority distribution (in order of priority) for wetlands in Pilibhit, Udham Singh Nagar, Hardoi, Farrukhabad, Bijnor, and Amroha districts in Ramganga basin. Area in ha.

| Priority List | Pilibhit |        | Udham Singh Nagar |        | Hardoi |       | Farrukhabad |      | Bijnor |      | Amroha |      | Total |        |
|---------------|----------|--------|-------------------|--------|--------|-------|-------------|------|--------|------|--------|------|-------|--------|
|               | Count    | Area   | Count             | Area   | Count  | Area  | Count       | Area | Count  | Area | Count  | Area | Count | Area   |
| <b>DJX</b>    | 1        | 5.3    | 15                | 60     | 0      | 0     | 0           | 0    | 0      | 0    | 0      | 0    | 16    | 65.3   |
| <b>DJY</b>    | 39       | 587.7  | 44                | 189.1  | 5      | 24.8  | 1           | 7.5  | 1      | 4.6  | 0      | 0    | 90    | 813.7  |
| <b>DJZ</b>    | 19       | 211.8  | 14                | 47.9   | 0      | 0     | 0           | 0    | 0      | 0    | 0      | 0    | 33    | 259.7  |
| <b>DKX</b>    | 10       | 159.6  | 24                | 152.6  | 0      | 0     | 0           | 0    | 1      | 4.1  | 0      | 0    | 35    | 316.3  |
| <b>DKY</b>    | 153      | 1691.4 | 34                | 136    | 27     | 147.5 | 6           | 33.5 | 1      | 3.2  | 0      | 0    | 221   | 2011.6 |
| <b>DKZ</b>    | 26       | 174.2  | 2                 | 6.5    | 0      | 0     | 1           | 7.8  | 0      | 0    | 0      | 0    | 29    | 188.5  |
| <b>DLX</b>    | 0        | 0      | 6                 | 36.2   | 0      | 0     | 0           | 0    | 0      | 0    | 0      | 0    | 6     | 36.2   |
| <b>DLY</b>    | 33       | 248.7  | 44                | 305.6  | 3      | 13.9  | 0           | 0    | 5      | 24.3 | 0      | 0    | 85    | 592.5  |
| <b>DLZ</b>    | 37       | 245.6  | 5                 | 22.4   | 0      | 0     | 0           | 0    | 1      | 7.6  | 0      | 0    | 43    | 275.6  |
| <b>DMX</b>    | 11       | 169.4  | 5                 | 26.8   | 0      | 0     | 0           | 0    | 1      | 6.3  | 1      | 5    | 18    | 207.5  |
| <b>DMY</b>    | 22       | 427.6  | 11                | 59.5   | 4      | 18.8  | 1           | 2.4  | 2      | 6.4  | 0      | 0    | 40    | 514.7  |
| <b>DMZ</b>    | 3        | 10.2   | 0                 | 0      | 0      | 0     | 0           | 0    | 0      | 0    | 0      | 0    | 3     | 10.2   |
| <b>TOTAL</b>  | 354      | 3931.5 | 204               | 1042.6 | 39     | 205   | 9           | 51.2 | 12     | 56.5 | 1      | 5    | 619   | 5291.8 |

Table S5: Monitoring priority distribution (in order of priority) for wetlands in Pilibhit, Udham Singh Nagar, Hardoi, Farrukhabad, Bijnor, and Amroha districts in Ramganga basin. Area in ha.

| Priority List | Pilibhit |      | Udham Singh Nagar |        | Hardoi |      | Farrukhabad |      | Bijnor |       | Amroha |      | Total |        |
|---------------|----------|------|-------------------|--------|--------|------|-------------|------|--------|-------|--------|------|-------|--------|
|               | Count    | Area | Count             | Area   | Count  | Area | Count       | Area | Count  | Area  | Count  | Area | Count | Area   |
| SMZ           | 0        | 0    | 0                 | 0      | 0      | 0    | 0           | 0    | 0      | 0     | 0      | 0    | 0     | 0      |
| SMY           | 1        | 6.2  | 7                 | 40.9   | 1      | 3.7  | 1           | 21.5 | 6      | 26.5  | 3      | 11.4 | 19    | 110.2  |
| SMX           | 0        | 0    | 4                 | 16.5   | 0      | 0    | 0           | 0    | 7      | 33.5  | 0      | 0    | 11    | 50     |
| SLZ           | 0        | 0    | 2                 | 1577.7 | 0      | 0    | 0           | 0    | 8      | 526.9 | 0      | 0    | 10    | 2104.6 |
| SLY           | 0        | 0    | 43                | 2794.2 | 0      | 0    | 0           | 0    | 1      | 12.2  | 0      | 0    | 44    | 2806.4 |
| SLX           | 0        | 0    | 5                 | 1351.1 | 0      | 0    | 0           | 0    | 4      | 15.8  | 0      | 0    | 9     | 1366.9 |
| SKZ           | 1        | 2.9  | 0                 | 0      | 0      | 0    | 0           | 0    | 1      | 4.5   | 0      | 0    | 2     | 7.4    |
| SKY           | 2        | 8.6  | 7                 | 37.5   | 5      | 89.4 | 1           | 4.2  | 6      | 33.2  | 1      | 4.2  | 22    | 177.1  |
| SKX           | 0        | 0    | 7                 | 39.2   | 0      | 0    | 3           | 11.6 | 10     | 74.1  | 2      | 13   | 22    | 137.9  |
| SJZ           | 0        | 0    | 5                 | 21.5   | 0      | 0    | 0           | 0    | 6      | 28.5  | 1      | 2.9  | 12    | 52.9   |
| SJY           | 0        | 0    | 13                | 1708.9 | 1      | 6.2  | 0           | 0    | 3      | 9.4   | 0      | 0    | 17    | 1724.5 |
| SJX           | 0        | 0    | 0                 | 0      | 0      | 0    | 0           | 0    | 1      | 6.4   | 1      | 3.2  | 2     | 9.6    |
| TOTAL         | 4        | 17.7 | 93                | 7587.5 | 7      | 99.3 | 5           | 37.3 | 53     | 771   | 8      | 34.7 | 170   | 8547.5 |
